# Supplementary material for: Semaphorin 3 C drives epithelial-to-mesenchymal transition, invasiveness, and stem-like characteristics in prostate cells
Source: PubMed Central journal article supplement (PMC5597577; doi:10.1038/s41598-017-11914-6), 2017-09-13
Supplement: 41598_2017_11914_MOESM1_ESM.pdf [file 41598_2017_11914_MOESM1_ESM.pdf]

## **SUPPLEMENTARY DATA**

### **Semaphorin 3C drives epithelial-to-mesenchymal transition, invasiveness, and stem-like characteristics in prostate cells**

Kevin J. Tam<sup>1,2</sup>, Daniel H. F. Hui<sup>1</sup>, Wilson W. Lee<sup>1</sup>, Mingshu Dong<sup>1</sup>,  
Tabitha Tombe<sup>1</sup>, Ivy Z. F. Jiao<sup>1</sup>, Shahram Khosravi<sup>1</sup>, Ario Takeuchi<sup>1</sup>,  
James W. Peacock<sup>1</sup>, Larissa Ivanova<sup>1</sup>, Igor Moskalev<sup>1</sup>, Martin E.  
Gleave<sup>1,2</sup>, Ralph Buttyan<sup>1,2</sup>, Michael E. Cox<sup>1,2</sup>, and Christopher J.  
Ong<sup>1,2\*</sup>

<sup>1</sup>Vancouver Prostate Centre, Vancouver General Hospital, 2660  
Oak Street, Vancouver, BC, Canada, V6H 3Z6

<sup>2</sup>Department of Urologic Sciences, University of British Columbia,  
Level 6, 2775 Laurel Street, Vancouver, BC, Canada, V5Z 1M9

\*Correspondence to: [chris.ong@ubc.ca](mailto:chris.ong@ubc.ca)

## Supplementary Figure S1. SEMA3C is a chemotactic agent

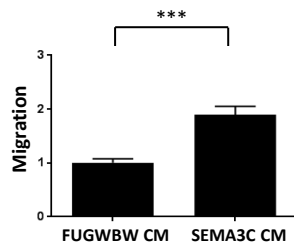

**Supplementary Figure S1. SEMA3C is a chemotactic agent.** RWPE-1-FUGWBW cells migrated more strongly toward conditioned media from SEMA3C-overexpressing RWPE-1-SEMA3C (SEMA3C CM) than to conditioned media from RWPE-1-FUGWBW (FUGWBW CM); y-axis is fold increase in migration over FUGWBW CM. Data represent mean,  $\pm$  SD; \*\*\*  $p < 0.001$ .

## Supplementary Figure S2. Intracardiac injection of NOD scid gamma mice with RWPE-1 stable cells

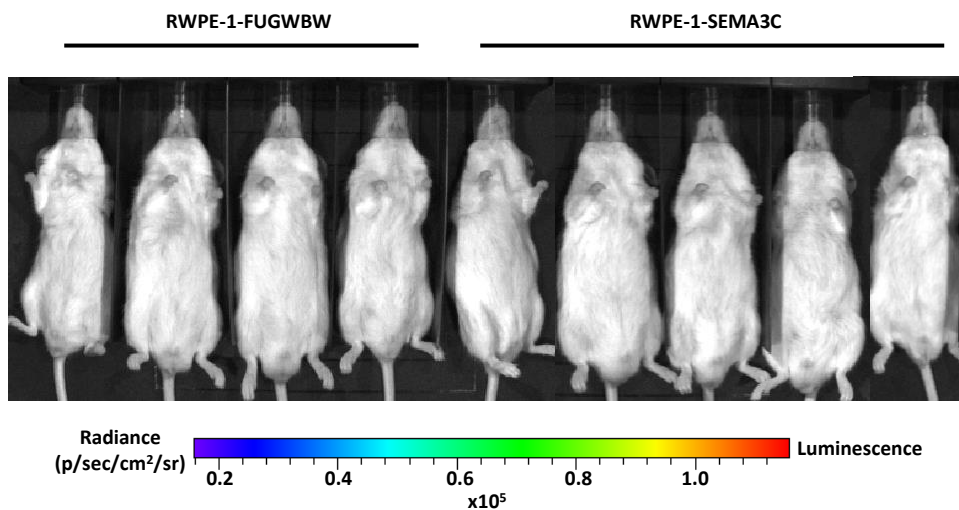

**Supplementary Figure S2. Intracardiac injection of NOD scid gamma mice with RWPE-1 stable cells.**  $5 \times 10^5$  luciferase-expressing RWPE-1-FUGWBW and RWPE-1-SEMA3C were injected by ultrasound-guided intracardiac injection and monitored for tumour formation by IVIS.

# Supplementary Figure S3. RWPE-1-SEMA3C-CD44<sup>high</sup> cells reconstitute the CD44<sup>low</sup> population

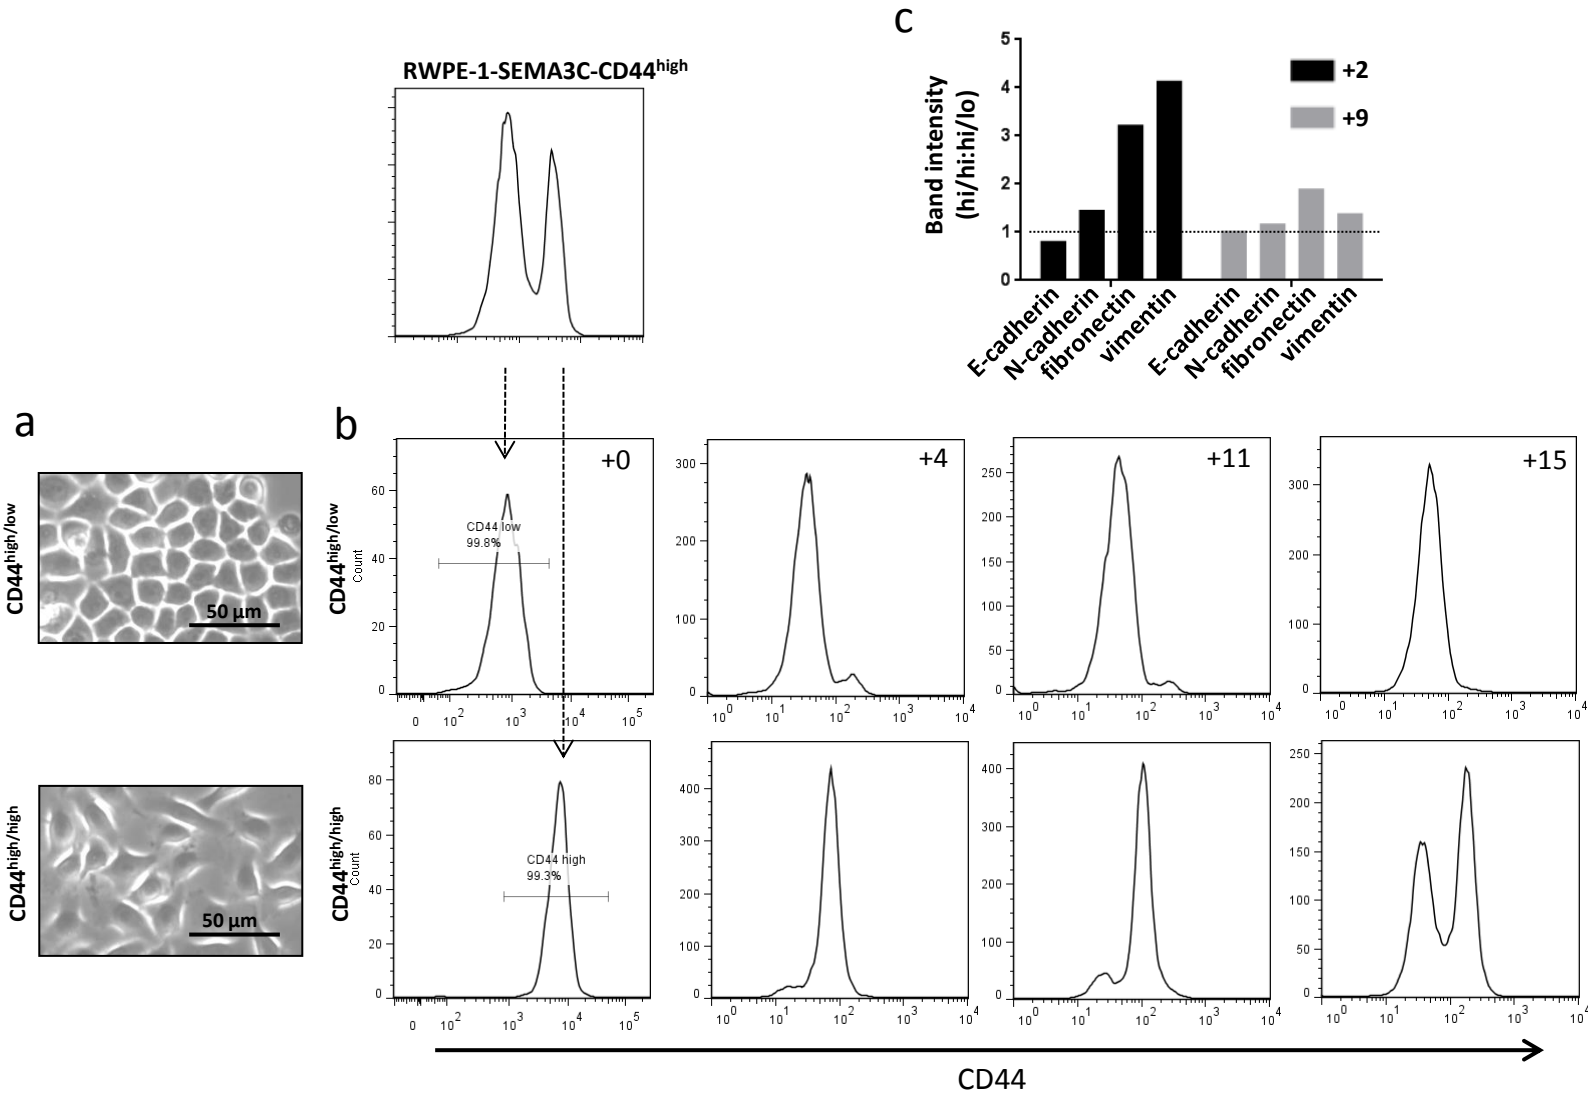

**Supplementary Figure S3. RWPE-1-SEMA3C-CD44<sup>high</sup> cells reconstitute the CD44<sup>low</sup> population.** CD44<sup>high</sup> cells were re-sorted on CD44 status into 'CD44<sup>high/low</sup>' and 'CD44<sup>high/high</sup>' populations; CD44<sup>high/low</sup> cells were cobble stone in morphology (a) and remained CD44-low (b). CD44<sup>high/high</sup> cells were spindle-shaped (a) and reconstituted the CD44<sup>low</sup> population (b). At two passages following sorting, CD44<sup>high/high</sup> cells were higher in N-cadherin, fibronectin, and vimentin expression and lower in E-cadherin expression than CD44<sup>high/low</sup> cells but the expression of these proteins became roughly equal by nine passages after sorting (c).

## Supplementary Figure S4. SEMA3C is expressed at higher levels in RWPE-1 spheroids than in adherent RWPE-1

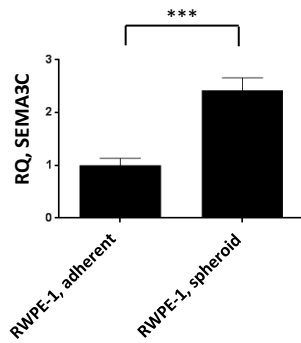

**Supplementary Figure S4. SEMA3C is expressed at higher levels in RWPE-1 spheroids than in adherent RWPE-1.** SEMA3C levels were compared between RWPE-1 cells plated under adherent conditions versus anchorage-independent conditions (as spheroids) by qPCR. Data represent mean,  $\pm$  SD; \*\*\*  $p < 0.001$ .

## Supplementary Figure S5. Repeat of RWPE-1 lentiviral transduction

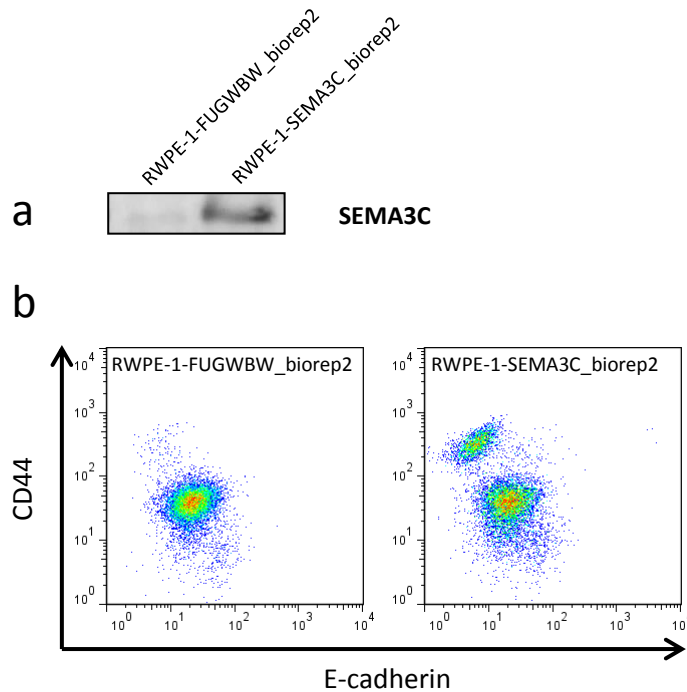

**Supplementary Figure S5. Repeat of RWPE-1 lentiviral transduction.** Lentiviral transduction of RWPE-1 cells was repeated. Overexpression of SEMA3C verified by Western blot of conditioned media (a). Upregulation of CD44 and its inverse staining relationship with E-cadherin was confirmed by FACS (b).

## Supplementary Figure S6. Upregulation of CD44 in additional prostate and breast lines overexpressing SEMA3C

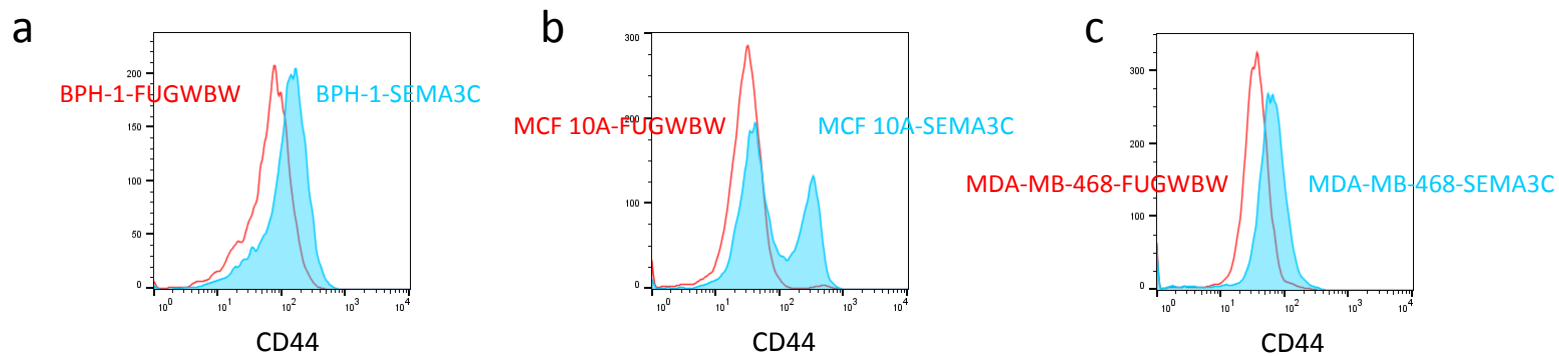

### Supplementary Figure S6. Upregulation of CD44 in additional prostate and breast lines overexpressing SEMA3C.

The CD44 status of an additional benign prostate line (BPH-1, a), a benign breast line (MCF 10A, b), and a breast cancer cell line (MDA-MB-468, c) stably overexpressing SEMA3C was documented by flow cytometry.

# Supplementary Figure S7. Antibodies used

## Antibodies:

|                                 | Ab                              | Company                      | Catalogue Number |
|---------------------------------|---------------------------------|------------------------------|------------------|
| <b>WESTERN BLOT</b>             | Actin                           | SIGMA                        | A2066            |
|                                 | Vinculin                        | SIGMA                        | V4505            |
|                                 | SEMA3C (N-20)                   | Santa Cruz Biotechnology     | sc-27796         |
|                                 | P-ERK                           | Cell Signaling Technology    | 4370S            |
|                                 | ERK                             | Cell Signaling Technology    | 4696S            |
|                                 | P-Akt                           | Cell Signaling Technology    | 4060S            |
|                                 | Akt                             | Invitrogen                   | 44609G           |
|                                 | P-EGFR                          | Cell Signaling Technology    | 3777S            |
|                                 | EGFR                            | Santa Cruz Biotechnology     | sc-377229        |
|                                 | E-cadherin                      | BD Transduction Laboratories | 610181           |
|                                 | N-cadherin                      | BD Transduction Laboratories | 610921           |
|                                 | vimentin                        | Cell Signaling Technology    | 3932S            |
|                                 | fibronectin                     | BD Transduction Laboratories | 610077           |
|                                 | Zeb1                            | Cell Signaling Technology    | 3396S            |
|                                 | anti-goat HRP                   | Dako                         | P0160            |
|                                 | anti-rabbit HRP                 | Dako                         | P0448            |
|                                 | anti-mouse HRP                  | Dako                         | P0447            |
|                                 | Alexa Fluor 680 anti-rabbit IgG | Invitrogen                   | A21109           |
|                                 | Alexa Fluor 680 anti-mouse IgG  | Invitrogen                   | A21058           |
|                                 | <b>FLOW CYTOMETRY</b>           | PE-Cy5 Isotype Control       | eBioscience      |
| CD44 PE-Cy5                     |                                 | eBioscience                  | 15-0441-82       |
| E-cadherin (5H9)                |                                 | Santa Cruz Biotechnology     | sc-52327         |
| N-cadherin                      |                                 | BD Transduction Laboratories | 610921           |
| vimentin                        |                                 | Cell Signaling Technology    | 3932S            |
| Alexa Fluor 488 anti-mouse IgG  |                                 | Invitrogen                   | A11059           |
| Alexa Fluor 488 anti-rabbit IgG |                                 | Invitrogen                   | A11008           |
| <b>IMMUNOFLUORESCENCE</b>       | CD44 PE-Cy5                     | eBioscience                  | 15-0441-82       |
|                                 | E-cadherin                      | BD Transduction Laboratories | 610181           |
|                                 | N-cadherin                      | BD Transduction Laboratories | 610921           |
|                                 | vimentin                        | Cell Signaling Technology    | 3932S            |
|                                 | Alexa Fluor 488 anti-mouse IgG  | Invitrogen                   | A11059           |
|                                 | Alexa Fluor 488 anti-rabbit IgG | Invitrogen                   | A11008           |
|                                 |                                 |                              |                  |
|                                 |                                 |                              |                  |
|                                 |                                 |                              |                  |
|                                 |                                 |                              |                  |

# Supplementary Figure S8. Primer sequences used

## Primer sequences:

E-cadherin-F: 5'-GACAACAAGCCCGAATT-3'  
E-cadherin-R: 5'-GGAAACTCTCTCGGTCCA-3'

N-cadherin-F: 5'-CGGGTAATCCTCCCAAATCA-3'  
N-cadherin-R: 5'-CTTTATCCCGGCGTTTCATC-3'

vimentin-F: 5'-GAGAACTTTGCCGTTGAAGC-3'  
vimentin-R: 5'-GCTTCCTGTAGGTGGCAATC-3'

fibronectin-F: 5'-CAGTGGGAGACCTCGAGAAG-3'  
fibronectin-R: 5'-TCCCTCGGAACATCAGAAAC-3'

SNAI1-F: 5'-GCAAATACTGCAACAAGG-3'  
SNAI1-R: 5'-GCACTGGTACTTCTTGACA -3'

TWIST1-F: 5'-GGAGTCCGCAGTCTTACGAG-3'  
TWIST1-R: 5'-TCTGGAGGACCTGGTAGAGG -3'

ZEB1-F: 5'-TGCACTGAGTGTGGAAAAGC-3'  
ZEB1-R: 5'-TGGTGATGCTGAAAGAGACG-3'

ZEB2-F: 5'-CGCTTGACATCACTGAAGGA-3'  
ZEB2-R: 5'-CTTGCCCACTCTGTGCATT-3'

GAPDH-F: 5'-ATGACCCCTTCATTGACCTCA-3'  
GAPDH-R: 5'-GAGATGATGACCCTTTTGGCT-3'
